# Supplementary material for: Preparation of Ni based mesoporous Al2O3 catalyst with enhanced CO2 methanation performance
Source: Royal Society of Chemistry journal article supplement (doi:10.1039/c8ra10348h), 2019-01-01
Supplement: c8ra10348h1.pdf [file c8ra10348h1.pdf]

**Preparation of Ni based mesoporous Al<sub>2</sub>O<sub>3</sub> catalyst with enhanced CO<sub>2</sub>  
methanation performance**

Jianghui Lin<sup>1†</sup>, Caiping Ma<sup>2,3†</sup>, Luo Jing<sup>4</sup>, Xianghui Kong<sup>1</sup>, Yanfei Xu<sup>1</sup>, Guangyuan Ma<sup>1</sup>, Jie Wang<sup>1</sup>, Chenghua Zhang<sup>5\*</sup>, Zhengfeng Li<sup>1</sup>, Mingyue Ding<sup>1,6\*</sup>

*<sup>1</sup>School of Power and Mechanical Engineering, Hubei International Scientific and Technological Cooperation Base of Sustainable Resource and Energy, Wuhan University, Wuhan 430072, China*

*<sup>2</sup>State Key Laboratory of Coal Conversion, Institute of Coal Chemistry, Chinese Academy of Sciences, Taiyuan 030001, China*

*<sup>3</sup>University of Chinese Academy of Sciences, Beijing 100049, China*

*<sup>4</sup>Xiamen Tobacco Industrial CO., LTD, Xiamen 361022, China*

*<sup>5</sup>Synfuels China Co. Ltd., Beijing 101407, China*

*<sup>6</sup>Key Laboratory of Advanced Energy Materials Chemistry (Ministry of Education), Nankai University, Tianjin 300071, China*

†These authors contributed equally to this work.

\*Corresponding author

E-mail address: [dingmy@whu.edu.cn](mailto:dingmy@whu.edu.cn) (Mingyue Ding); [zhangchh@sxicc.ac.cn](mailto:zhangchh@sxicc.ac.cn)

(Chenghua Zhang).

---

---

**Table 1s** Comparison of catalysts with different pore sizes

| Catalysts                     | $S_{\text{BET}}^{\text{a}}$ ( $\text{m}^2 \cdot \text{g}^{-1}$ ) | $D_{\text{p}}^{\text{b}}$ (nm) | $\text{CO}_2^{\text{c}}$ con. (%) | $\text{CH}_4^{\text{c}}$ sel. (%) | Ref        |
|-------------------------------|------------------------------------------------------------------|--------------------------------|-----------------------------------|-----------------------------------|------------|
| 25Ni/MA                       | 237.0                                                            | 3.1                            | 77.2                              | 99.9                              | This paper |
| 25Ni/CA                       | 166.2                                                            | 4.7                            | 72.6                              | 99.5                              | This paper |
| 25Ni/ $\text{Al}_2\text{O}_3$ | 188.3                                                            | 8.1                            | 73.0                              | 99.0                              | 1          |

a Surface area of the support.

b Pore diameter of the support.

c The reaction temperature is 350-360 °C.

---

**Table 2s** Comparison of as-prepared catalyst and other typical catalysts for CO<sub>2</sub>

methanation

| Catalysts                             | T/°C | P/atm | CO <sub>2</sub> con./% | CH <sub>4</sub> sel./% | Ref.       |
|---------------------------------------|------|-------|------------------------|------------------------|------------|
| Ni/CA                                 | 380  | 1.0   | 73.6                   | 99.4                   | This paper |
| Ni/MA                                 | 360  | 1.0   | 77.2                   | 99.9                   | This paper |
| Ni/Al <sub>2</sub> O <sub>3</sub>     | 400  | —     | 70.5                   | 69.5                   | 2          |
| Ni/SiO <sub>2</sub>                   | 400  | —     | 67.5                   | 65.5                   | 2          |
| Ni/TiO <sub>2</sub>                   | 450  | 1.0   | 64.0                   | 97.5                   | 3          |
| Ni/MgO                                | 450  | 1.0   | 60.0                   | 96.5                   | 3          |
| Ni/CeO <sub>2</sub> -ZrO <sub>2</sub> | 350  | 1.0   | 67.9                   | 98.4                   | 4          |

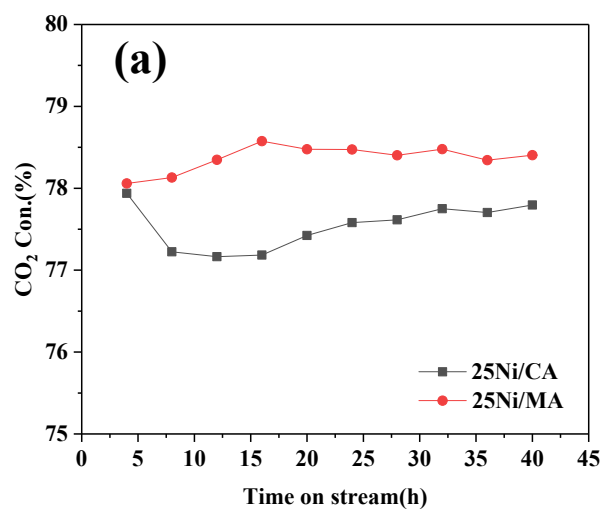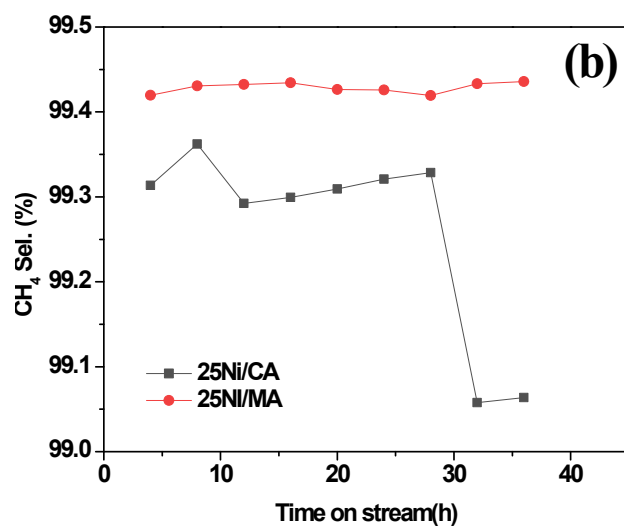

**Fig. 1s** Deactivation test of the 25Ni/CA and 25Ni/MA catalyst at 400 °C, GHSV =

6000 ml·g<sup>-1</sup>·h<sup>-1</sup>, H<sub>2</sub>/CO<sub>2</sub> = 4, 1 atm.

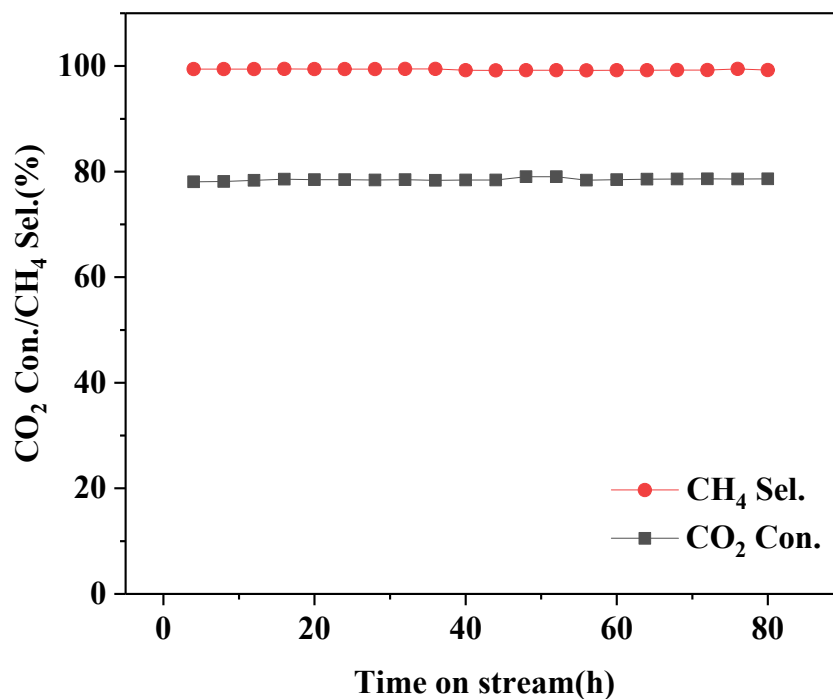

**Fig. 2s** Reusability test of the 25Ni/MA catalyst at 400 °C, GHSV = 6000 ml·g<sup>-1</sup>·h<sup>-1</sup>,  
H<sub>2</sub>/CO<sub>2</sub> = 4, 1atm.

## References

- 1 S. Rahmani, M. Rezaei and F. Meshkani, *J. Ind. Eng. Chem.*, 2014, **20**, 1346-1352.
- 2 X. Guo, A. Traitangwong, M. Hu, C. Zuo, V. Meeyoo, Z. Peng and C. Li, *Energy and Fuels*, 2018, **32**, 3681-3689.
- 3 S. Tada, T. Shimizu, H. Kameyama, T. Haneda and R. Kikuchi, *Int. J. Hydrogen Energy*, 2012, **37**, 5527-5531.
- 4 P. A. U. Aldana, F. Ocampo, K. Kobl, B. Louis, F. Thibault-Starzyk, M. Daturi, P. Bazin, S. Thomas and A. C. Roger, *Catal. Today*, 2013, **215**, 201-207.
